# Supplementary material
Source: HighWire-hosted journal article supplement (https://openres.ersjournals.com/content/7/3/00921-2020)
Supplement: inline-supplementary-material-1 [file inline-supplementary-material-1.pdf]

## **ONLINE SUPPLEMENTARY MATERIAL**

### **Accompanied versus unaccompanied walking for continuous oxygen saturation measurement during 6-minute walk test in COPD: a randomised cross-over study**

Thomas F. Riegler<sup>1,2</sup>, Anja Frei<sup>3</sup>, Sarah R. Haile<sup>3</sup> and Thomas Radtke<sup>3</sup>

<sup>1</sup> Berner Reha Zentrum AG, Heiligenschwendi, Switzerland

<sup>2</sup> Institute for Physiotherapy, Zurich University of Applied Sciences, Zurich, Switzerland

<sup>3</sup> Epidemiology, Biostatistics and Prevention Institute, University of Zurich, Switzerland

## Results

**Table S1.** Pre- and post-test conditions in the two experimental conditions

| Outcome                   | 6MWT <sub>with</sub><br>n=22 |           | 6MWT <sub>without</sub><br>n=27 |           |
|---------------------------|------------------------------|-----------|---------------------------------|-----------|
|                           | pre-test                     | post-test | pre-test                        | post-test |
| Heart rate, bpm           | 89 ± 13                      | 109 ± 14  | 89 ± 13                         | 108 ± 12  |
| SpO <sub>2</sub> , %      | 94 ± 2                       | 86 ± 6    | 94 ± 3                          | 86 ± 6    |
| SpO <sub>2</sub> nadir, % |                              | 85 ± 5    |                                 | 85 ± 6    |
| Dyspnoea, 0-10            | 0.2 ± 0.7                    | 3.5 ± 2.1 | 0.2 ± 0.6                       | 3.5 ± 2.1 |
| Leg fatigue, 0-10         | 0.4 ± 0.9                    | 2.7 ± 1.6 | 0.4 ± 0.9                       | 2.7 ± 1.4 |

Data are given as mean ± standard deviation. Perceived dyspnoea and leg fatigue were measured using a 0-10 Borg Scale. 6MWT six-minute walk test, 6MWT<sub>without</sub> patient walking alone during 6MWT, 6MWT<sub>with</sub> assessor walking behind the patient during 6MWT, bpm, beats per minute, SpO<sub>2</sub> oxygen saturation.

**Table S2.** Patient perceptions during the two 6MWTs (n=49)

|                                                                               | <b>6MWT<sub>with</sub></b> | <b>6MWT<sub>without</sub></b> | <b>either</b>   |               |                    |
|-------------------------------------------------------------------------------|----------------------------|-------------------------------|-----------------|---------------|--------------------|
| Which test did you like more?                                                 | 12<br>(25%)                | 8<br>(16%)                    | 29<br>(59%)     |               |                    |
| <b>Questions concerning the</b>                                               |                            |                               |                 |               |                    |
| <b>assessor accompanying the patient</b>                                      | <b>absolutely not</b>      | <b>a little bit</b>           | <b>moderate</b> | <b>strong</b> | <b>very strong</b> |
| To which extent did you feel slowed down by the assessor accompanying you?    | 46<br>(94%)                | 2<br>(4%)                     | 1<br>(2%)       | 0<br>(0%)     | 0<br>(0%)          |
| To which extent did you feel pushed forward by the assessor accompanying you? | 37<br>(76%)                | 9<br>(18%)                    | 1<br>(2%)       | 1<br>(2%)     | 1<br>(2%)          |
| To which extent did you feel bothered by the assessor accompanying you?       | 47<br>(96%)                | 1<br>(2%)                     | 1<br>(2%)       | 0<br>(0%)     | 0<br>(0%)          |
| Did you feel safer because the assessor accompanied you?                      | 29<br>(60%)                | 8<br>(16%)                    | 2<br>(4%)       | 8<br>(16%)    | 2<br>(4%)          |

6MWT six-minute walk test, 6MWT<sub>without</sub> patient walking alone during 6MWT, 6MWT<sub>with</sub> assessor accompanying the patient during 6MWT.

**Figure S1.** Bland-Altman plot showing differences in six-minute walking distance between the two experimental conditions.

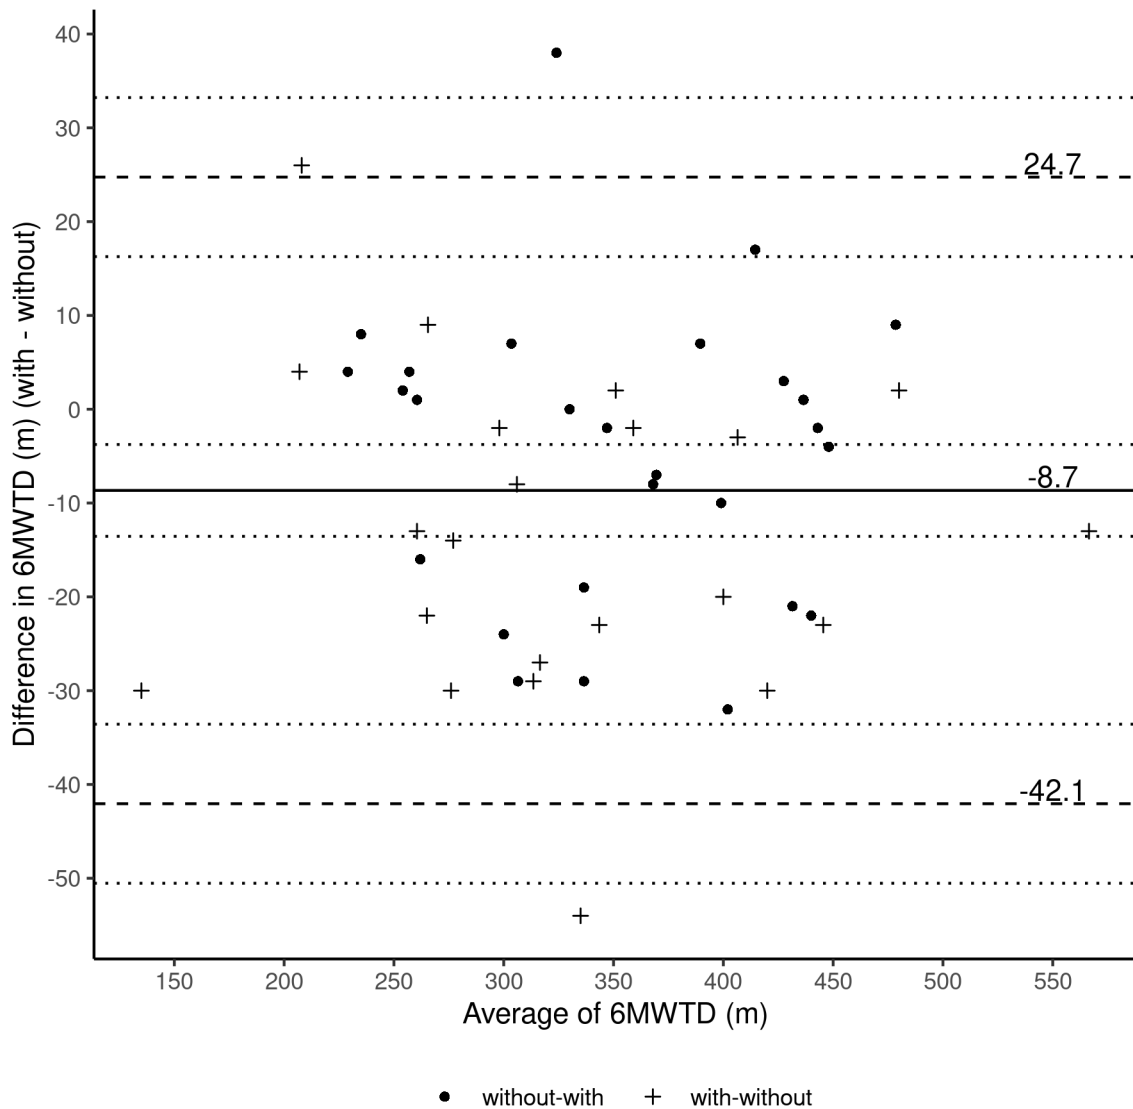

6MWT: 6-Minute Walk Test distance. The solid line represents the mean difference, and the dashed lines represents the upper and lower limits of agreement (mean difference  $\pm$  1.96 x standard deviation of the differences). The dotted lines indicate the 95% confidence intervals of the mean difference and the lower and upper limits of agreement. Mean difference: -8.7m [95% CI, -13.5 to -3.8]. Lower limit of agreement: -42.1m [95% CI, -50.5 to -33.6]. Upper limit of agreement: 24.8m [95% CI, 16.3 to 33.2].
